# Supplementary figures and images for: Hydrogen Peroxide: Its Role in Plant Biology and Crosstalk with Signalling Networks
Source: MDPI journal article supplement (doi:10.3390/ijms19092812), 2018-09-18

Figure S1. Supplementary figure to Table 2.

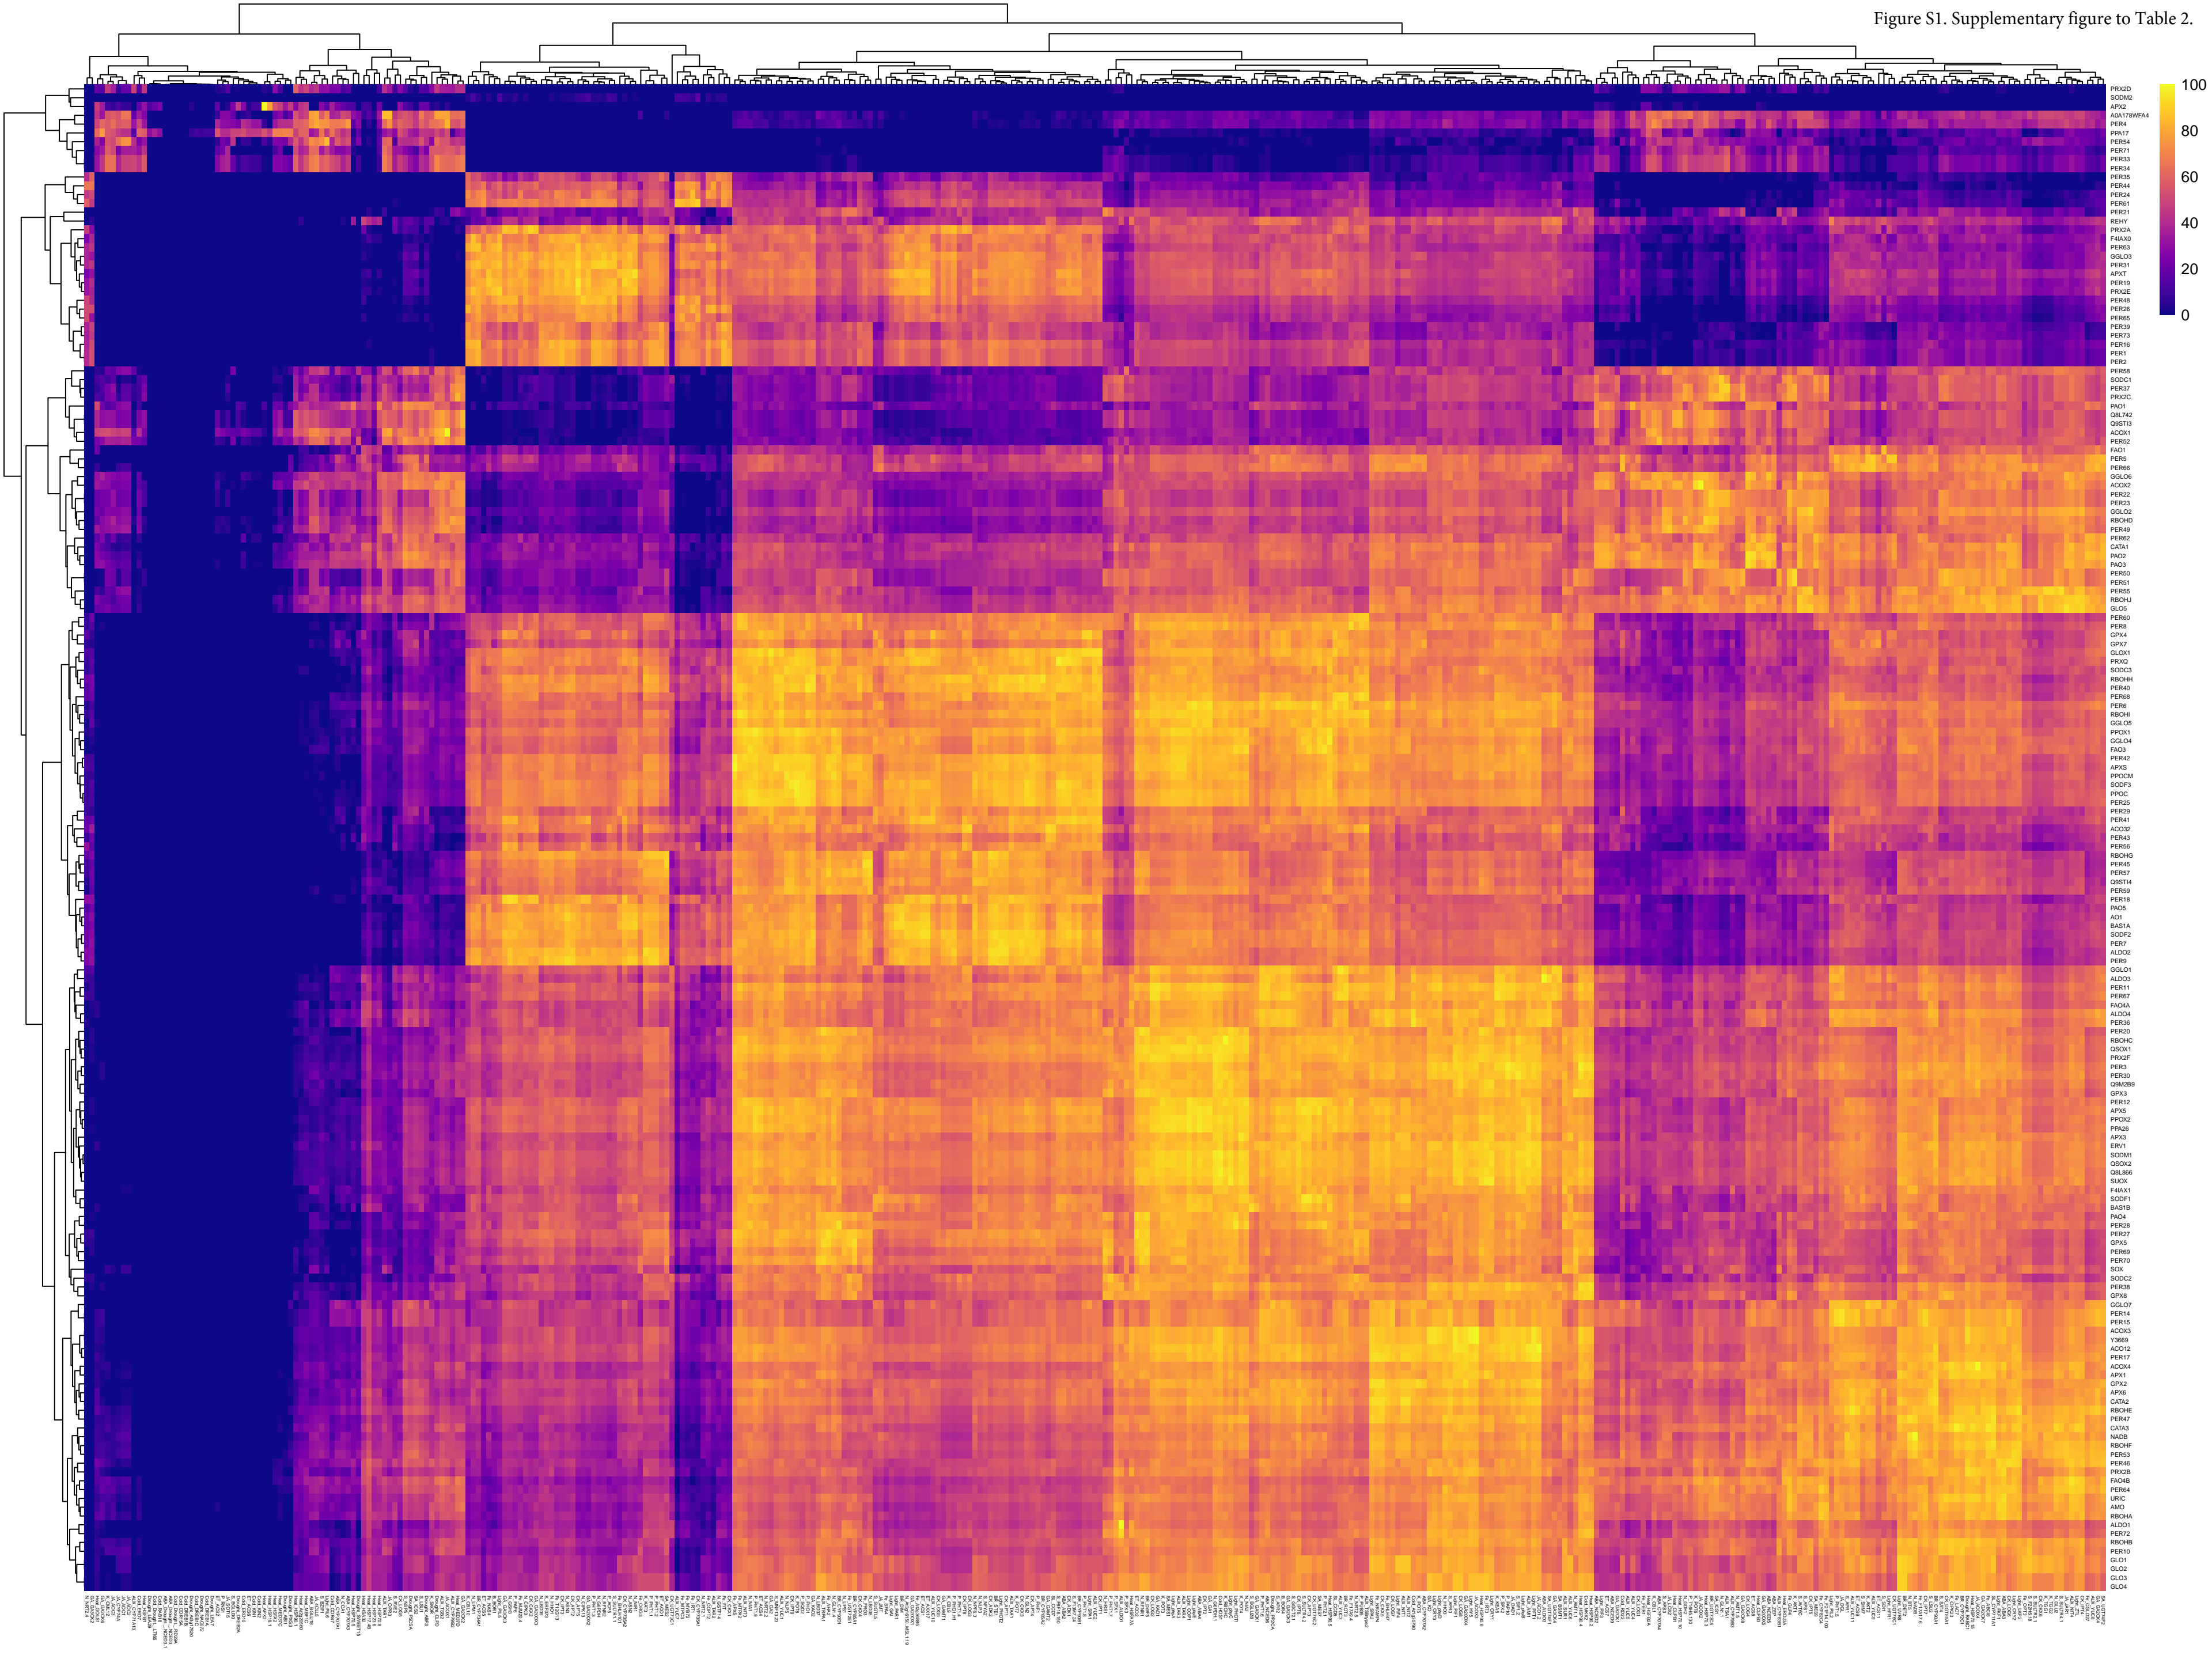

Supplement: s1 [file s1]
